# Supplementary material
Source: Springer Nature journal article supplement (https://www.springermedizin.de/resource/supplementary/12889_2013_6279_MOESM1_ESM.pdf/9499142)
Supplement: MOESM1 [file 9499142]

Determination of scoping review question

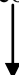

Development of a search strategy

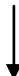

Broad search of literature to determine keywords

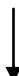

Determination of keywords

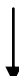

Identification of literature for title and abstract review

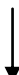

Independent review of titles and abstracts

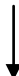

Independent article review

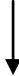

Article review meeting

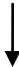

Result or Outcome
